# Supplementary material
Source: PubMed Central journal article supplement (PMC2777102)
Supplement: E09-06-0453_1.pdf [file E09-06-0453_1.pdf]

**Figure S1. Rescue the membrane targeting of GFP-Rabex-5 to early endosomes in Rab22-depleted cells by overexpression of Rabaptin-5.** Confocal fluorescence microscopy showing restored targeting of GFP-Rabex-5 to EEA1-containing endosomes in Rab22-depleted HeLa cells. Cells were transfected with the pSIREN-RetroQ-DsRed-Express construct expressing a Rab22-specific shRNA as indicated (red). GFP-Rabex-5 (green) and Myc-Rabaptin-5 were co-expressed in these cells via the bi-directional pBI vector. At 48 hour post-transfection, the cells were fixed, permeabilized, and immuno-stained with the anti-EEA1 polyclonal antibody (blue), followed by confocal fluorescence microscopy. Bar = 15  $\mu$ m.

**Figure S2. Rescue the co-localization of Rab22 and Rab5 in NF73 cells by expression of various Rabex-5 mutants.** Confocal fluorescence microscopy showing co-localization of GFP-Rab5 and RFP-Rab22 on early endosomes in NF73 cells expressing Myc-Rabex-5(1-399), Myc-Rabex-5(135-480), and Myc-Rabex-5:D314A. GFP-Rab5 and RFP-Rab22 were co-expressed with the indicated Rabex-5 mutants and were identified by confocal fluorescence microscopy. The co-expression of the Rabex-5 mutants in the cells was confirmed by immunofluorescence microscopy (not shown). Bar = 15  $\mu$ m

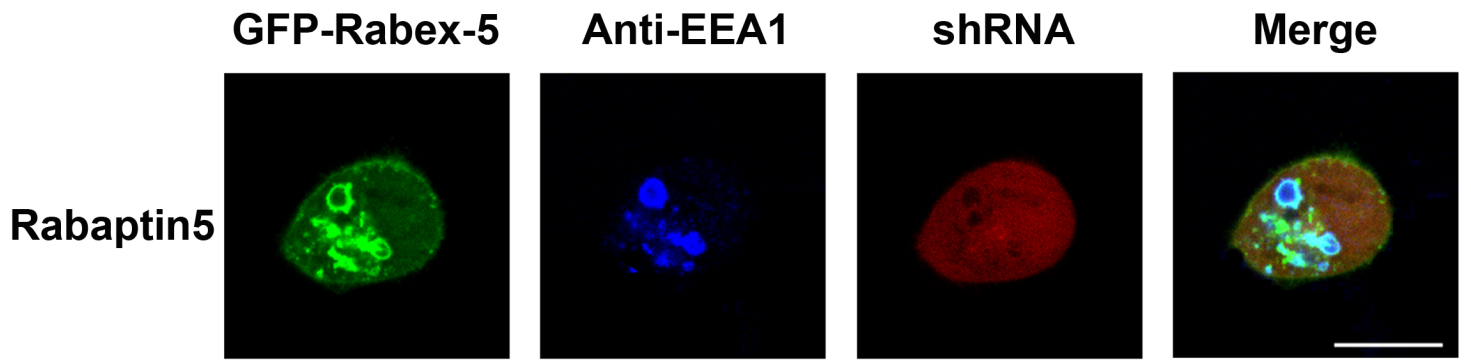

**Figure S1**

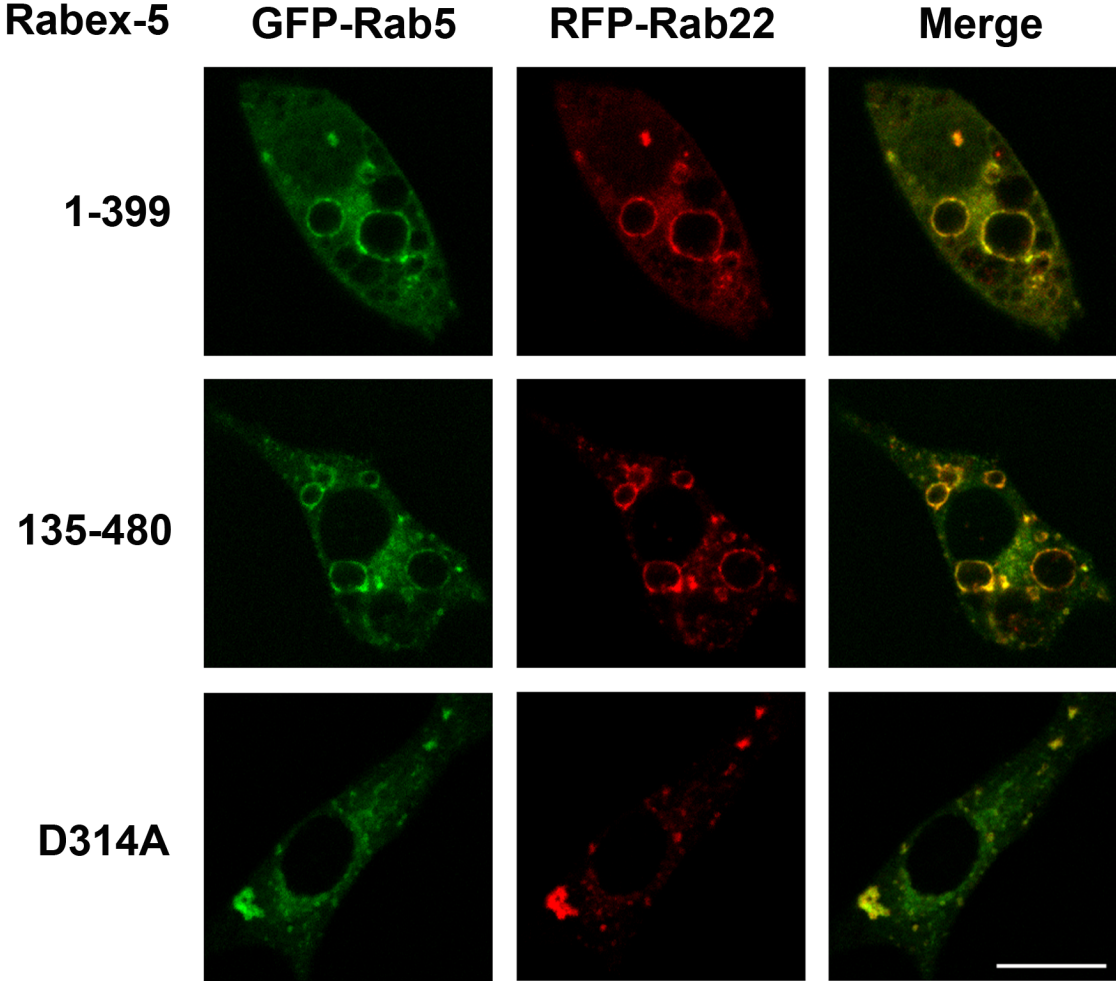

Figure S2
